# Supplementary material for: Adjuvant Docetaxel or Vinorelbine with or without Trastuzumab for Breast Cancer
Source: Atypon-hosted journal article supplement (doi:10.1056/nejmoa053028), 2006-02-22
Supplement: nejm_joensuu_809sa1.pdf [file nejm_joensuu_809sa1.pdf]

## Supplementary Appendix

This appendix has been provided by the authors to give readers additional information about their work.

Supplement to: Joensuu H, Kellokumpu-Lehtinen P-L, Bono P, et al. Adjuvant docetaxel or vinorelbine with or without trastuzumab for breast cancer. *N Engl J Med* 2006;354:809-20.

Table S1. Events in the study

|                                            | <u>All patients in the study</u> |                     | <u>Patients with <i>erbB2</i> amplification</u> |                |
|--------------------------------------------|----------------------------------|---------------------|-------------------------------------------------|----------------|
|                                            | Docetaxel/<br>FEC                | Vinorelbine/<br>FEC | Trastuzumab                                     | No trastuzumab |
| Number of patients                         | 502                              | 507*                | 115*                                            | 116            |
| Patient alive, event-free                  | 460                              | 436                 | 103                                             | 89             |
| Patients with any event†                   | 42                               | 71                  | 12                                              | 27             |
| Distant recurrence                         | 33                               | 58                  | 8                                               | 26             |
| Locoregional recurrence                    | 9                                | 17                  | 2                                               | 6              |
| Contralateral breast cancer                | 6                                | 10                  | 3                                               | 1              |
| Death with no evidence of<br>breast cancer | 2                                | 1                   | 1                                               | 1              |
| Any death                                  | 20                               | 30                  | 6                                               | 14             |
| Second primary cancer                      | 1                                | 5                   | 0                                               | 2              |

\*One patient with overt distant metastasis at the time of randomization was excluded from efficacy analyses.

†Patients with any recurrence, or death without prior recurrence.
